# Supplementary material for: Optimization of CdS@MoS2 core–shell nanorod arrays for an enhanced photo-response for photo-assisted electrochemical water splitting under solar light illumination
Source: Royal Society of Chemistry journal article supplement (doi:10.1039/c6ra17478g), 2016-01-01
Supplement: c6ra17478g1.pdf [file c6ra17478g1.pdf]

### Supporting information

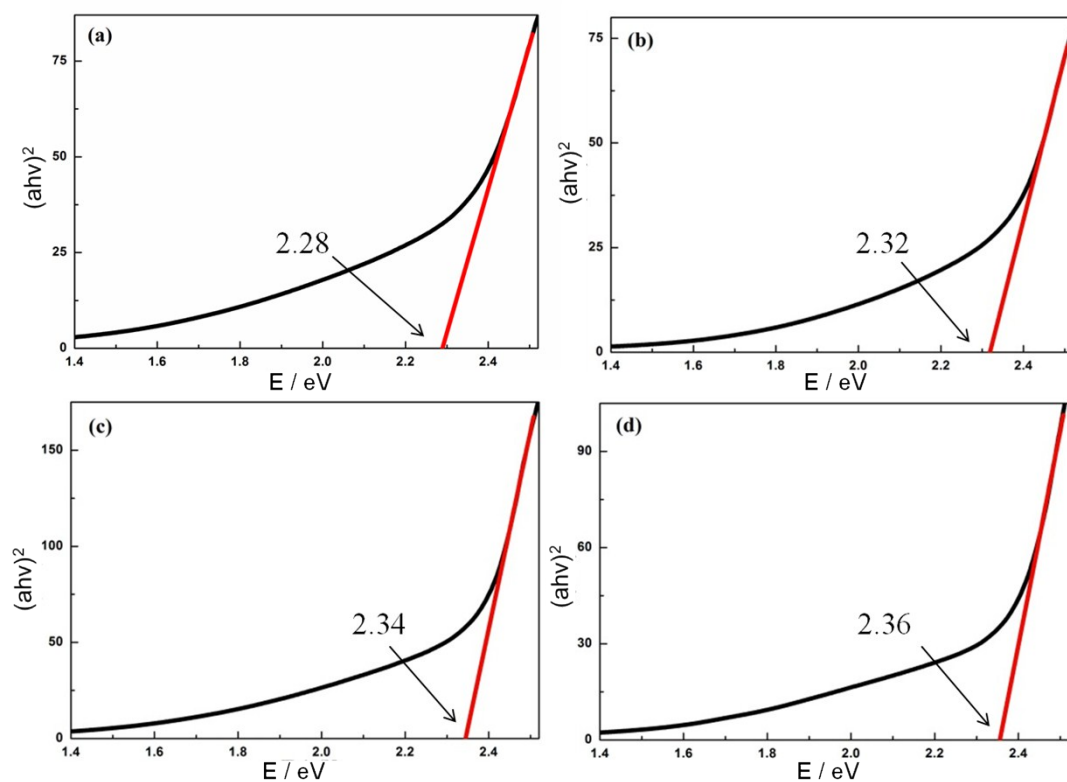

Fig. S1 The band gap of the CdS@MoS<sub>2</sub> nanorod prepared with different hydrothermal time. (a) 2h, (b) 3h, (c) 4h and (d) 5h

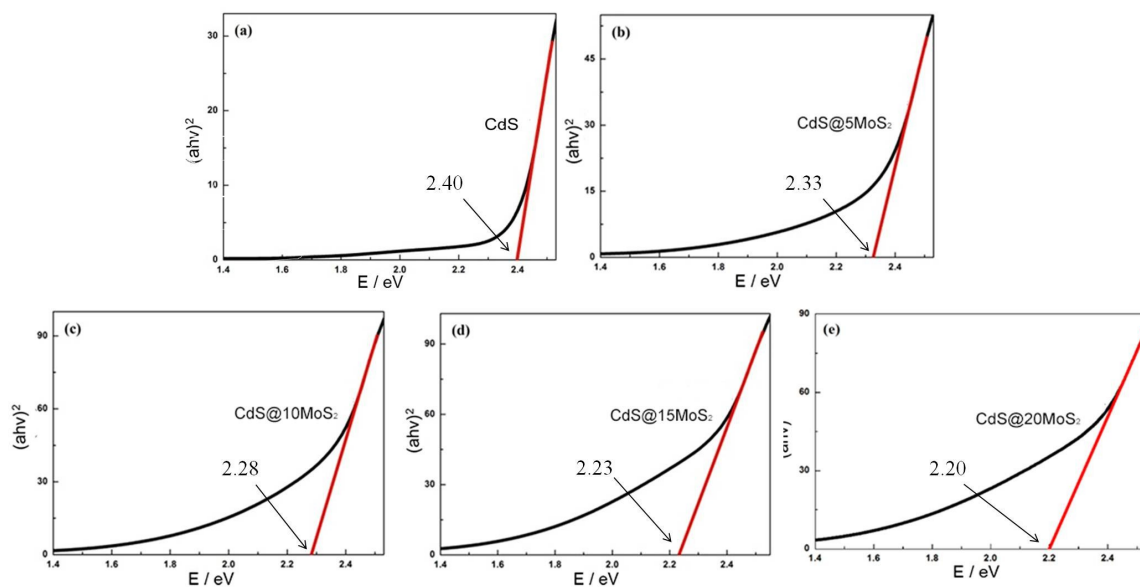

Fig. S2 The band gap of the CdS@MoS<sub>2</sub> nanorod prepared with different deposition time of MoS<sub>2</sub>. (a) 0 min, (b) 5 min, (c) 10 min, (d) 15 min and (e) 20 min.

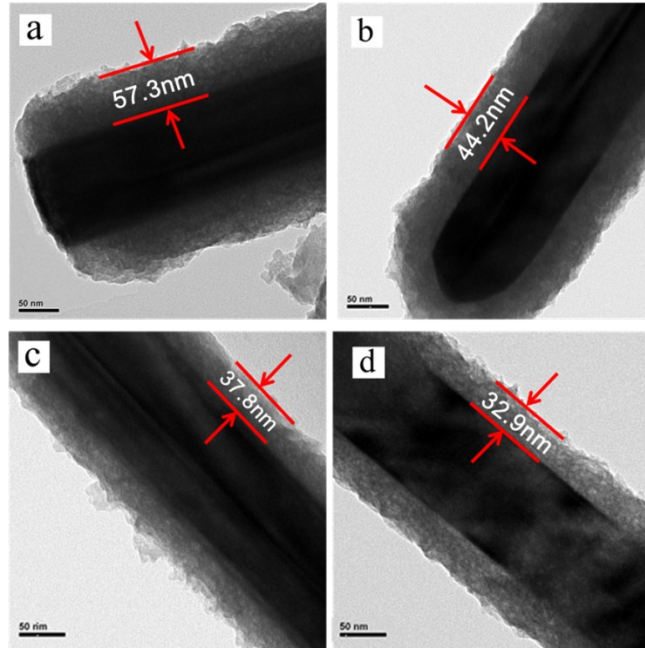

Fig.S3 d TEM images of CdS@MoS<sub>2</sub> nanorod prepared with different hydrothermal time: (a) 2h, (b) 3h, (c) 4h, and (d) 5h. (The CdS nanorods were prepared by hydrothermal method with 7 mmol of Cd(NO<sub>3</sub>)<sub>2</sub>•4H<sub>2</sub>O, and the electrodeposition time of MoS<sub>2</sub> was 15min.)

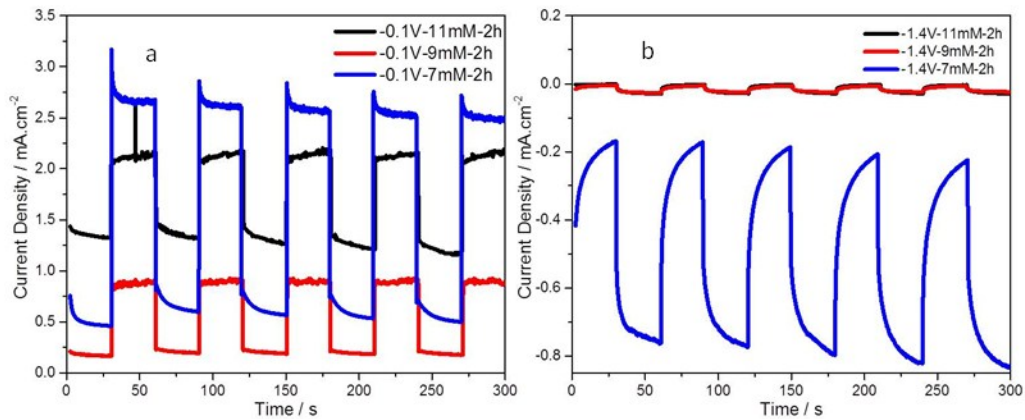

Fig.S4 On-off J-t curves of CdS@MoS<sub>2</sub> nanorod array prepared with different precursor concentrations under bias of (a) -0.1V vs. SCE, (b) -1.4V vs. SCE in 0.50 M Na<sub>2</sub>S/Na<sub>2</sub>SO<sub>3</sub> solution. The hydrothermal time is 2h, and the electrodeposition time is 15 minutes.
